# Supplementary material for: Regional and sectoral contributions of NO x and reactive carbon emission sources to global trends in tropospheric ozone during the 2000–2018 period
Source: Copernicus journal article supplement (doi:10.5194/egusphere-2024-432), 2024-03-12
Supplement: Supplementary file [file egusphere-2024-432-AC2-supplement.pdf]

## Response in Red.

References to line/paragraph numbers are provided with respect to the previous preprint (available online) and not the revised version.

## Text Changes in Blue.

The changed text includes references to figures and tables from the revised manuscript.

We now recognize that our method of calculating the tropospheric CH<sub>4</sub> lifetime by dividing the tropospheric CH<sub>4</sub> burden by the tropospheric CH<sub>4</sub> oxidation rate, isn't consistent with previous studies that calculate this quantity. We now estimate this quantity correctly and consistently with previous studies: dividing the total atmospheric CH<sub>4</sub> burden by the tropospheric CH<sub>4</sub> oxidation rate (Prather 2007). With this method, we now calculate a tropospheric CH<sub>4</sub> lifetime of ~8.42 years for the year 2010 as opposed to the previously calculated ~7.13 years (Table S4). The 2000-2018 mean tropospheric CH<sub>4</sub> lifetime from our simulations is ~8.54 years which is well within the 7.1 - 10.6 years of ACCMIP range reported by Voulgarakis et al., 2013.

We now modify the paragraph at line 231:

"The tropospheric methane lifetime (~8.54 years), calculated as the total atmospheric methane burden divided by tropospheric methane oxidation rate, decreases with high certainty (-0.01 years/yr; Table S5) in our simulations (Fig. 4a: Magenta line). This result is contrary to the expectation that methane lifetime might increase due to increasing methane concentrations leading to a smaller availability of OH radicals to oxidize methane (Prather et al., 1996). CH<sub>4</sub> oxidation with OH radical being the major loss pathway for CH<sub>4</sub>, we show the time-series of OH in Fig.4b. Here we simulate an increasing trend in air-mass-weighted tropospheric OH concentration (a prominent indicator for tropospheric oxidizing capacity; e.g., Voulgarakis et al., 2013, Chua et al., 2023) but with low certainty. Nevertheless, the CH<sub>4</sub>-reaction-weighted tropospheric OH concentration (Lawrence et al., 2001) shows an increasing trend with high sensitivity. This increasing trend in tropospheric OH concentration is consistent with the trend discussed in Chua et al., (2023) and explains the decreasing lifetime of CH<sub>4</sub> as these quantities are inversely proportional. The increasing OH availability despite increasing CH<sub>4</sub> concentration could be due to increasing NO<sub>x</sub> emissions over the simulated period that recycle HO<sub>2</sub> to OH (e.g. Lelieveld et al., 2008; Chua et al., 2023). The mean magnitude of our air-mass-weighted tropospheric OH concentration (~12.63 \* 10<sup>5</sup> molec/cm<sup>3</sup>) is slightly larger than previous studies (~10.75 \* 10<sup>5</sup> molec/cm<sup>3</sup> in Chua et al., 2023 or ~11.7 \* 10<sup>5</sup> molec/cm<sup>3</sup> in Voulgarakis et al., 2013) which is likely why we

simulate a mean tropospheric CH<sub>4</sub> lifetime slightly smaller than the aforementioned studies (~9 years), but within the multi-model range (7.1-10.6 years) reported in Voulgarakis et al., (2013)."

The timeseries figure (Fig. 4) shown in response to referee #1's major comment #4 is now modified as shown below:

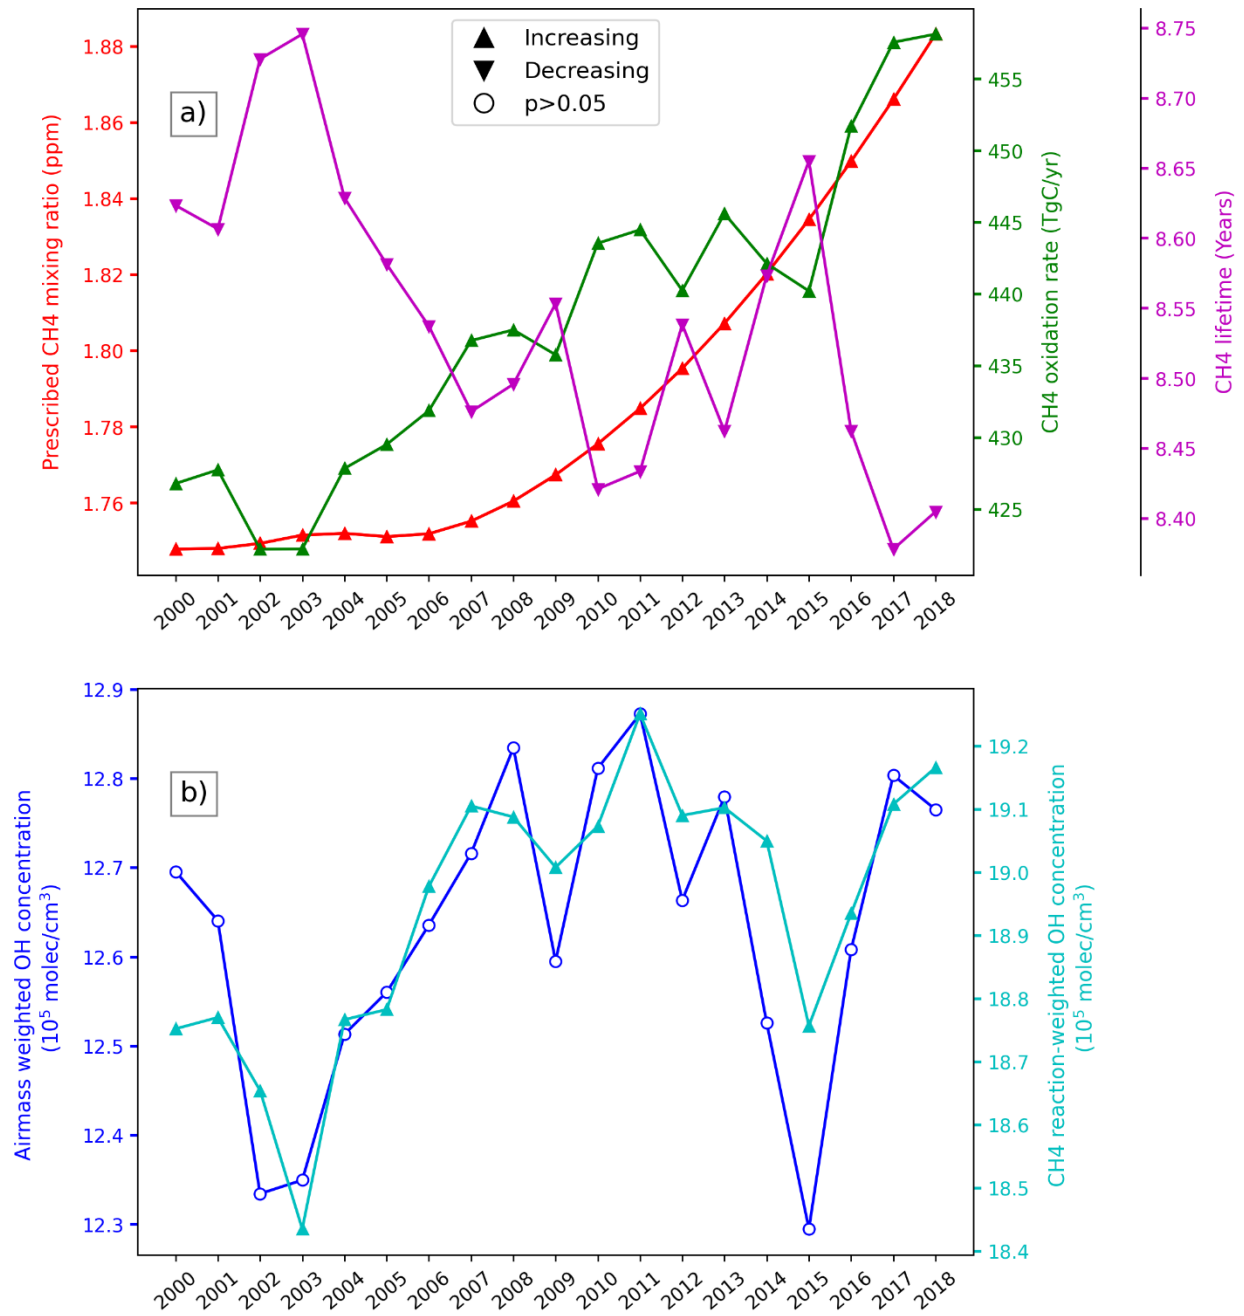

**Fig. 4:** a) Red line: Annually varying Methane mixing ratio (in ppm) prescribed in our model. Green line: Tropospheric Methane oxidation rate (in TgC/yr) simulated by our model. Magenta line: Tropospheric Lifetime of Methane (in years). b) Airmass weighted and CH<sub>4</sub>-reaction weighted tropospheric OH concentration (in 10<sup>5</sup> molec/cm<sup>3</sup>). The symbols on the plotted timeseries indicate the sign of trend in the plotted quantity. The mean values, slope of trend, 95 % confidence interval and p-value for the 2000-2018 period are provided in Table S5.

## Reference (in addition to the ones in preprint and previous author response file)

Prather, Michael J. "Lifetimes and time scales in atmospheric chemistry." *Philosophical Transactions of the Royal Society A: Mathematical, Physical and Engineering Sciences* 365.1856 (2007): 1705-1726.
